# Supplementary material
Source: HighWire-hosted journal article supplement (https://bmjopen.bmj.com/content/12/4/e056895)
Supplement: inline-supplementary-material-3 [file inline-supplementary-material-3.pdf]

Table: Measures of timeliness with cutoff values from different guidelines

| Interval                                                                                       | Cutoff value                                                                                     | Guidelines                                              | Naming of interval                                                  |
|------------------------------------------------------------------------------------------------|--------------------------------------------------------------------------------------------------|---------------------------------------------------------|---------------------------------------------------------------------|
| Onset of symptoms to first doctor visit <sup>28 51</sup>                                       | 30 days                                                                                          | BTS                                                     | Patient's Application interval <sup>28 51</sup>                     |
| First clinical presentation to first suspicious investigation <sup>35 80</sup>                 | 28 days                                                                                          | DLCG                                                    |                                                                     |
| First abnormal investigation (CXR) to confirmation of diagnosis/specialist visit <sup>41</sup> | 14 days                                                                                          | BTS                                                     |                                                                     |
|                                                                                                | 56 days                                                                                          | RAND                                                    |                                                                     |
| GP to Specialist <sup>24 28 35-37 42 49 51 61 69 70 84</sup>                                   | 1 day for urgent referrals, 10 days for standard referrals                                       | IOM                                                     | Referral delay <sup>49</sup> or Referral Interval <sup>28 51</sup>  |
|                                                                                                | 80% within 3–5 days                                                                              | ACCP, DLCG, DAPPDT                                      |                                                                     |
|                                                                                                | 7 days                                                                                           | BTS, NICE, NNG                                          |                                                                     |
|                                                                                                | 14 days                                                                                          | UKNHS, Australian, UKDoH, SIGN, SMAC, CSCC, SLCG        |                                                                     |
| Primary care to initiation of treatment <sup>28 35 42 51 63 67 68 77</sup>                     | 14 days                                                                                          | DLCG                                                    | System interval <sup>35</sup> or Doctor's interval <sup>28 51</sup> |
|                                                                                                | 42 days                                                                                          | SLCG, CSCC                                              |                                                                     |
|                                                                                                | 62 days                                                                                          | UKNHS, UKNCP, BTS, Joint Council for Clinical Radiology |                                                                     |
|                                                                                                | 98 days                                                                                          | RAND                                                    |                                                                     |
|                                                                                                | 28 days for treatment decision, 35 days for systemic therapy 42 days for surgery or radiotherapy | Norwegian National Guidelines                           |                                                                     |
| Referral to secondary care to Diagnosis <sup>28 36 45 51 61 84</sup>                           | 28 days                                                                                          | UKDoH, CSCC, DLCG                                       | Diagnosis Interval <sup>28 51</sup>                                 |
|                                                                                                | 14 days                                                                                          | BTS                                                     |                                                                     |
| First referral to secondary care to treatment start <sup>21 35 44 69-71 80</sup>               | 42 days                                                                                          | Australian                                              | Secondary care interval <sup>35</sup>                               |
|                                                                                                | 49 days                                                                                          | NOLCP                                                   |                                                                     |
|                                                                                                | 62 days                                                                                          | UKNHS, SEHD, NICE, BTS                                  |                                                                     |
|                                                                                                | 42 days in ≥85% patients                                                                         | DLCG                                                    |                                                                     |
| First clinical presentation to Diagnosis <sup>35 84</sup>                                      | 28 days                                                                                          | CSCC                                                    | Diagnostic interval <sup>35</sup>                                   |
|                                                                                                | 60 days                                                                                          | RAND                                                    |                                                                     |
| First investigation to treatment <sup>45</sup>                                                 | 14 days                                                                                          | DLCG                                                    |                                                                     |
| Diagnostic investigation to patient informed of diagnosis <sup>49</sup>                        | 7 days                                                                                           | BTS                                                     | Informed diagnostic delay <sup>49</sup>                             |
| Diagnosis to Treatment start <sup>28 35 41 45-47 51 55 68 80 84 110</sup>                      | 14 days                                                                                          | Australian, DLCG                                        | Treatment interval <sup>28 35 51 55 68</sup>                        |
|                                                                                                | 14 days in ≥80% patients, 35 days if mediastinoscopy                                             | SLCG, DAPPDT                                            | or Therapeutic delay <sup>47</sup>                                  |
|                                                                                                | 14 days until surgery                                                                            | CSCC                                                    |                                                                     |
|                                                                                                | 21 days                                                                                          | DLCG, DAPPDT                                            |                                                                     |
|                                                                                                | 28 days                                                                                          | NOLCP                                                   |                                                                     |
|                                                                                                | 31 days                                                                                          | UKNHS                                                   |                                                                     |
|                                                                                                | 42 days for NSCLC/14 days for SCLC                                                               | RAND                                                    |                                                                     |
|                                                                                                | 42 days                                                                                          | DLCG, *Other study                                      |                                                                     |

| Interval                                                                           | Cutoff value                                                                     | Guidelines                                                | Naming of interval                                                                                                                                                                      |
|------------------------------------------------------------------------------------|----------------------------------------------------------------------------------|-----------------------------------------------------------|-----------------------------------------------------------------------------------------------------------------------------------------------------------------------------------------|
| First clinical presentation to treatment start <sup>24 34 35</sup>                 | 56 days for surgery<br>52 days                                                   | SMAC, UKDoH, SIGN,<br>Cutoff value proposed by authors    | Total interval <sup>35</sup>                                                                                                                                                            |
| Decision to treatment to initiation of treatment <sup>43 67 71 77</sup>            | 21 days<br>31 days (28 days for surgery & radiotherapy, 7 days for chemotherapy) | UKNHS<br>UKNCP, BTS, Joint Council for Clinical Radiology |                                                                                                                                                                                         |
| Surgery to chemotherapy (Adjuvant chemotherapy) <sup>43</sup>                      | 48 days                                                                          | UKNHS                                                     |                                                                                                                                                                                         |
| Referral receipt to specialist consultation <sup>21 43</sup>                       | 14 days                                                                          | UKNHS, SEHD, NICE                                         |                                                                                                                                                                                         |
| Oncology referral to radiotherapy/ chemotherapy <sup>70</sup>                      | 14 days                                                                          | BTS, NICE                                                 |                                                                                                                                                                                         |
| Specialist consultation to surgery <sup>41 69 70 79</sup>                          | 56 days                                                                          | BTS, NICE                                                 |                                                                                                                                                                                         |
| Surgeon consultation/Surgical waiting list to surgery <sup>61 70 79</sup>          | 28 days<br>14 days                                                               | BTS, NICE<br>CSCC, *Other study                           |                                                                                                                                                                                         |
| Onset of symptoms to treatment <sup>28 51</sup>                                    | 72 days                                                                          | BTS, Canadian guidelines                                  | Total interval <sup>28 51</sup>                                                                                                                                                         |
| Primary care referral to first diagnostic evaluation of symptom <sup>37</sup>      | 7 days                                                                           | BTS                                                       | Type I missed opportunity (No evaluation or work-up was initiated within 7 days of appearance of a predefined clinical clue) <sup>37</sup>                                              |
| Primary care referral to completion of evaluation at referral center <sup>37</sup> | 30 days                                                                          | BTS, *Other article                                       | Type II missed opportunity (Failure to complete within 30 days a diagnostic procedure or consultation or the follow-up action requested in response to a predefined clue) <sup>37</sup> |

\*Cutoff value adapted from other studies. IOM: Institute of Medicine, CSCC: Canadian Strategy for Cancer Control, NHMRC: National Health and Medical Research Council, ACCP: American College of Chest Physicians, BTS: British Thoracic Society, UKDoH: United Kingdom Department of Health, UKNHS: United Kingdom National Health Service, NICE: National Institute for Health and Care Excellence, UKNCP: United Kingdom National Cancer Plan, SLCG: Swedish Lung Cancer Group, RAND: Research and Development USA, NOLCP: National Optimal Lung Cancer Pathway, SEHD: Scottish Executive Health Department, DLGG: Danish Lung Cancer Group, SMAC: Standing Medical Advisory Committee, SIGN: Scottish Intercollegiate Guideline Network, CCA: Cancer Council Australia, DAPPDT: Dutch Association of Physicians for Pulmonary Disease and Tuberculosis, NNG: Norwegian National Guidelines.
